# Supplementary material for: Taking account of asymptomatic infections: A modeling study of the COVID-19 outbreak on the Diamond Princess cruise ship
Source: PubMed Central journal article supplement (PMC7963096; doi:10.1371/journal.pone.0248273), 2021-03-16
Supplement: pone.0248273.s001.pdf [file pone.0248273.s001.pdf]

```
##### eAppendix #####
#####
# R code for the paper with
# title: Taking Account of Asymptomatic Infections |V
#       A Modeling Study on the COVID-19 Outbreak
#       on the Diamond Princess Cruise Ship
# serial interval= 6 days
#####
```

```
##### Data #####
# data on the Number of individuals testing positive from Table in
# Mizumoto K, Kagaya K, Zarebski A, Chowell G. Estimating the
# asymptomatic proportion of coronavirus disease 2019 (COVID-19)
# cases on board the Diamond Princess cruise ship, Yokohama,
# Japan, 2020. Eurosurveillance 2020;25(10).
# doi: 10.2807/1560|V7917.ES.2020.25.10.2000180.
#
# We set Jan 20 as day 0. Then Jan 21 is day 1, Feb 3 is day 14
# Feb 6 is day 17, Feb 7 - 10 are days 18 - 21, Feb 12 is day 23
```

```
days <- c(1, 14, 17, 18, 19, 20, 21, 23, 24, 26, 27, 28, 29, 30)
cases <- c(1, 10, 10, 41, 3, 6, 65, 39, 44, 67, 70, 99, 88, 79)
cumcases<- cumsum(cases)
# [1] 1 11 21 62 65 71 136 175 219 286 356 455 543 622
```

```
##*#####
### based on field briefing,
# National Institute of Infectious Disease. Field briefing: Diamond
# Princess COVID-19 cases.
# https://www.niid.go.jp/niid/en/2019-ncov-e/9407-covid-dp-fe-01.html
#
```

```
# 34 cases before 2/6, adjust cases[2:4]
#####
cases[2]<- cases[2]+7
cases[3]<- cases[3]+7
cases[4]<- cases[4]-14
cumcases<- cumsum(cases)
```

```
#> cumcases
# [1] 1 18 35 62 65 71 136 175 219 286 356 455 543 622
```

```
#####
#For those dates that Y, the number of new COVID-19 cases, was not
# reported, linear interpolation was used.
#
```

```
dayseq<-seq(1, 30, by=1)
caseseq <- rep(1.0, length(dayseq))
```

```
caseseq[2:14] <- cases[2]/(days[2]-days[1])
caseseq[15:17] <- cases[3]/(days[3]-days[2])
caseseq[18:21] <- cases[4:7]
caseseq[22:23] <- cases[8]/(days[8]-days[7])
caseseq[24] <- cases[9]
caseseq[25:26] <- cases[10]/(days[10]-days[9])
caseseq[27:30] <- cases[11:14]
```

```
#> caseseq
# [1] 1.000000 1.307692 1.307692 1.307692 1.307692 1.307692 1.307692 1.307692
# [8] 1.307692 1.307692 1.307692 1.307692 1.307692 1.307692 1.307692
# [15] 5.666667 5.666667 5.666667 27.000000 3.000000 6.000000 65.000000
# [22] 19.500000 19.500000 44.000000 33.500000 33.500000 70.000000 99.000000
# [29] 88.000000 79.000000
```

```
#round to integers
```

```

caseseq[6:8] <- 1
caseseq[9]<- 2

caseseq[10:12] <- 1
caseseq[13]<- 2

caseseq[14]<- 2

caseseq[15]<- 5
caseseq[16]<- 6
caseseq[17]<- 6

caseseq[22]<- 19
caseseq[23]<- 20
caseseq[25] <- 33
caseseq[26] <- 34

```

```

#> caseseq
# [1] 1 1 1 1 2 1 1 1 2 1 1 1 2 2 5 6 6 27 3 6 65 19 20 44 33
# [26] 34 70 99 88 79

```

```

#####
#serial interval 6 days
#Then daily data were aggregated into 6-day intervals

```

```

sixdays=rep(1:5, each=6)
y=sapply(split(caseseq[1:30], sixdays), sum)

```

```

#> y
# 1 2 3 4 5
# 7 7 48 157 403
# represents 1/21-1/26, 1/27-2/1, 2/2-2/7, 2/8-2/13, 2/13-2/20

```

```

#
#case 1 at day 0
y<- c(1,y)
y[2]<- y[2]-1

```

```

#> y
# 1 2 3 4 5
# 1 6 7 48 157 403

```

```

names(y)[1] <- "0"

```

```

#> y
# 0 1 2 3 4 5
# 1 6 7 48 157 403

```

```

#cumulative cases
#include case 1 at t=0
cumy<- cumsum(y)[2:5]

```

```

#> cumy
# 0 1 2 3 4 5
# 1 7 14 62 219 622

```

```

#number of people at risk on board if infected is removed
N0=3712-cumy

```

```

#> N0
# 0 1 2 3 4 5
#3711 3705 3698 3650 3493 3090

```

```

#####
#number of crew member 1045 + passenger 2666

```

```

# field briefing

```

```

# among 619 cases (=82 crew+ 537 passengers)
fc=82/619
fp= 537/619

# assumption (d)(i) in the paper from 2/8 assume that
# of all infected cases, 86.8%(=537/619) were passengers and
# 13.2% (=82/619) crew. We use these proportions to calculate
# the number of infected persons in each group

cumicrew=floor(fc*cumy[])

#> cumicrew
# 0 1 2 3 4 5
# 0 0 1 8 29 82

icrew=c(0, diff(cumicrew))
#infected crew, paper notation Ict
#> icrew
# 1 2 3 4 5
# 0 0 1 7 21 53

names(icrew)[1] <- "0"

#> icrew
# 0 1 2 3 4 5
# 0 0 1 7 21 53

# c0 is (crew-infected crew(removed))
# in the paper notation Ct is the number of crew members on board at time t

c0= rep(1045,6)-cumicrew

#> c0
# 0 1 2 3 4 5
#1045 1045 1044 1037 1016 963

# number of infected passengers (case 1 at day 0 included) at time t
# in the paper notation Ipt
ipger<- y-icrew
#> ipger
# 0 1 2 3 4 5
# 1 6 6 41 136 350

#pgr0 is number (passengers - infected passengers(removed)) on board
pgr0= c(rep(2667, 6))-cumsum(ipger)

#> pgr0
# 0 1 2 3 4 5
#2666 2660 2654 2613 2477 2127

#####
##### Likelihood Function #####

llik.cb.new=function (beta, I, aratio, roomp)
{ # for serial-interval 6 days
# I is number of new cases

#index=1 is time 0 I[1]=1
#likelihood 1/21-1/26, assumption (a)
p1= 1 - exp(-beta*I[1]/(N0[1]+1))
L= -sum(dbinom(I[2], N0[1], p1, log = TRUE) )

#likelihood from 1/27-2/1 assumption (b)
p2= 1 - exp(-beta*I[2]/N0[1])

```

```

p3= 1 - exp(-beta*(I[2]+I[3])/N0[1])
L = L - sum(dbinom(I[4], N0[3], p3, log = TRUE) )

####likelihood from 2/8-2/13
# assumption (d)(ii)
pcrew = 1 - exp(-beta * I[4]/(N0[3]))
L = L -dbinom(icrew[5], c0[4], pcrew, log = TRUE)

# Passengers stayed in cabins most of the time. Assume that
# among infected passengers Ipt, the proportion of infections
# that occurred in cabins is rp, and that the average occupancy
# per cabin is 2.
# assumption (d)(iii)
ppger2=1 - exp(-beta * 0.5)
ipger2=floor(ipger[5]*roomp)

L = L -dbinom(ipger2, ipger[4], ppger2, log = TRUE)

# The other (1 - rp) proportion of infected passengers; cases
# was possibly due to asymptomatic crew members who continued to work.
# assumption (d)(iv)
ppger = 1 - exp(-beta * aratio*icrew[4]/c0[4])
ipger2rm=ipger[5] - ipger2 #remaing (1-rp) cases
L = L -dbinom(ipger2rm, (pgr0[4]-ipger[4]), ppger, log = TRUE)

#### likelihood from 2/14-2/19, analogous to 2/8-2/13
# assumption (d)(ii)
pcrew = 1 - exp(-beta * I[5]/(N0[4]))
L = L -dbinom(icrew[6], c0[5], pcrew, log = TRUE)

# assumption (d)(iii)
ppger2=1 - exp(-beta * 0.5)
ipger2=floor(ipger[6]*roomp)

L = L -dbinom(ipger2, ipger[5], ppger2, log = TRUE)

# assumption (d)(iv)
ppger = 1 - exp(-beta * aratio*icrew[5]/c0[5])
ipger2rm=ipger[6] - ipger2 #remaing (1-rp) cases
L = L -dbinom(ipger2rm, (pgr0[5]-ipger[5]), ppger, log = TRUE)

return(L)
}

```

```

#####
##### modify some R-functions in Bjornstad (2018) #####
# and use bbmle R-package
# Bolker B. bbmle: Tools for general maximum likelihood estimation.
# https://cran.r-project.org/web/packages/bbmle/.
#
#####
##### roomp=rp=0.2 #####
##### aratio=0.4 #####
#percentages of infection in the same room
roomp<- 23/115

```

```

betacand = seq(0.1,15, by = 0.05)
ll = rep(NA, length(betacand))

# plot the likelihood and check maximum
for(i in 1:length(betacand)){
  ll[i] = lik.cb.new(beta = betacand[i],
  I = y, aratio=0.4, roomp=0.2)}
plot(ll ~ betacand, ylab = "Neg log-lik",

```

```

#> betacand[which.min(l1)]
#[1] 3.95

fit = mle2(llik.cb.new, start = list(beta = 3.95), fixed=list(aratio=0.4, roomp=0.2),
  method = "Brent", data = list(I = y), lower=1, upper=15)

summary(fit)
confint(fit)

# > summary(fit)
# Maximum likelihood estimation
#
# Call:
# mle2(minuslogl = llik.cb.new, start = list(beta = 3.95), method = "Brent",
#   fixed = list(aratio = 0.4, roomp = 0.2), data = list(I = y),
#   lower = 1, upper = 15)
#
# Coefficients:
#   Estimate Std. Error z value Pr(z)
# beta 3.94418 0.16174 24.386 < 2.2e-16 ***
# ---
# Signif. codes: 0 '***' 0.001 '**' 0.01 '*' 0.05 '.' 0.1 ' ' 1
#
# -2 log L: 787.4827
# > confint(fit)
# Profiling...
#
# 2.5 % 97.5 %
# 3.635916 4.270077

```

```

##### roomp=rp= 0.2 #####
##### aratio=0.465 #####

```

```

betacand = seq(0.1,15, by = 0.05)
l1 = rep(NA, length(betacand))

# plot the likelihood and check maximum
for(i in 1:length(betacand)){
  l1[i] = llik.cb.new(beta = betacand[i],
    I = y, aratio=0.465, roomp=0.2)}
plot(l1 ~ betacand, ylab = "Neg log-lik",
  xlab = expression(beta))
betacand[which.min(l1)]

```

```

# > betacand[which.min(l1)]
# [1] 3.85

```

```

fit = mle2(llik.cb.new, start = list(beta = 3.85), fixed=list(aratio=0.465, roomp=0.2),
  method = "Brent", data = list(I = y), lower=1, upper=15)

```

```

summary(fit)
confint(fit)

```

```

# > summary(fit)
# Maximum likelihood estimation
#
# Call:
# mle2(minuslogl = llik.cb.new, start = list(beta = 3.85), method = "Brent",
#   fixed = list(aratio = 0.465, roomp = 0.2), data = list(I = y),
#   lower = 1, upper = 15)
#
# Coefficients:
#   Estimate Std. Error z value Pr(z)
# beta 3.84087 0.15735 24.409 < 2.2e-16 ***
# ---
# Signif. codes: 0 '***' 0.001 '**' 0.01 '*' 0.05 '.' 0.1 ' ' 1

```

```

# Profiling...
#
# 2.5 % 97.5 %
# 3.540946 4.157911

##### roomp=rp=0.2 #####
##### aratio=0.505 #####

betacand = seq(0.1,15, by = 0.05)
ll = rep(NA, length(betacand))

# plot the likelihood and check maximum
for(i in 1:length(betacand)){
  ll[i] = llik.cb.new(beta = betacand[i],
    I = y, aratio=0.505, roomp=0.2)}
plot(ll ~ betacand, ylab = "Neg log-lik",
  xlab = expression(beta))
betacand[which.min(ll)]

# > betacand[which.min(ll)]
# [1] 3.8

fit = mle2(llik.cb.new, start = list(beta = 3.8), fixed=list(aratio=0.505, roomp=0.2),
  method = "Brent", data = list(I = y), lower=1, upper=15)

summary(fit)
confint(fit)

# > summary(fit)
# Maximum likelihood estimation
#
# Call:
# mle2(minuslogl = llik.cb.new, start = list(beta = 3.8), method = "Brent",
#   fixed = list(aratio = 0.505, roomp = 0.2), data = list(I = y),
#   lower = 1, upper = 15)
#
# Coefficients:
# Estimate Std. Error z value Pr(z)
# beta 3.78004 0.15477 24.423 < 2.2e-16 ***
# ---
# Signif. codes: 0 '***' 0.001 '**' 0.01 '*' 0.05 '.' 0.1 ' ' 1
#
# -2 log L: 656.7847
# > confint(fit)
# Profiling...
#
# 2.5 % 97.5 %
# 3.485014 4.091871

##### roomp=rp=0.2 #####
##### aratio=0.6 #####

betacand = seq(0.1,15, by = 0.05)
ll = rep(NA, length(betacand))

# plot the likelihood and check maximum
for(i in 1:length(betacand)){
  ll[i] = llik.cb.new(beta = betacand[i],
    I = y, aratio=0.6, roomp=0.2)}
plot(ll ~ betacand, ylab = "Neg log-lik",
  xlab = expression(beta))
betacand[which.min(ll)]

# > betacand[which.min(ll)]

```

```

method = "Brent", data = list(I = y), lower=1, upper=15)

summary(fit)
confint(fit)

# > summary(fit)
# Maximum likelihood estimation
#
# Call:
# mle2(minuslogl = llik.cb.new, start = list(beta = 3.65), method = "Brent",
#   fixed = list(aratio = 0.6, roomp = 0.2), data = list(I = y),
#   lower = 1, upper = 15)
#
# Coefficients:
#   Estimate Std. Error z value Pr(z)
# beta 3.64324 0.14899 24.453 < 2.2e-16 ***
# ---
# Signif. codes: 0 '***' 0.001 '**' 0.01 '*' 0.05 '.' 0.1 ' ' 1
#
# -2 log L: 566.721
# > confint(fit)
# Profiling...
#
# 2.5 % 97.5 %
# 3.359223 3.943399
#

##### different roomp=rp=0.3 #####
##### aratio=0.4 #####
roomp =0.3

betacand = seq(0.1,15, by = 0.05)
ll = rep(NA, length(betacand))

# plot the likelihood and check maximum
for(i in 1:length(betacand)){
  ll[i] = llik.cb.new(beta = betacand[i],
  I = y, aratio=0.4, roomp=0.3)}
plot(ll ~ betacand, ylab = "Neg log-lik",
xlab = expression(beta))
betacand[which.min(ll)]

# > betacand[which.min(ll)]
# [1] 4.4

fit = mle2(llik.cb.new, start = list(beta = 4.4), fixed=list(aratio=0.4, roomp=0.3),
method = "Brent", data = list(I = y), lower=1, upper=15)

summary(fit)
confint(fit)

# > summary(fit)
# Maximum likelihood estimation
#
# Call:
# mle2(minuslogl = llik.cb.new, start = list(beta = 4.4), method = "Brent",
#   fixed = list(aratio = 0.4, roomp = 0.3), data = list(I = y),
#   lower = 1, upper = 15)
#
# Coefficients:
#   Estimate Std. Error z value Pr(z)
# beta 4.41228 0.18417 23.957 < 2.2e-16 ***
# ---
# Signif. codes: 0 '***' 0.001 '**' 0.01 '*' 0.05 '.' 0.1 ' ' 1
#

```

```
#
# 2.5 % 97.5 %
# 4.061687 4.783852
```

```
#####different roomp =rp=0.3 #####
##### aratio=0.465 #####
roomp =0.3
betacand = seq(0.1,15, by = 0.05)
ll = rep(NA, length(betacand))
```

```
# plot the likelihood and check maximum
for(i in 1:length(betacand)){
  ll[i] = llik.cb.new(beta = betacand[i],
    I = y, aratio=0.465, roomp=0.3)}
plot(ll ~ betacand, ylab = "Neg log-lik",
  xlab = expression(beta))
betacand[which.min(ll)]
```

```
# > betacand[which.min(ll)]
# [1] 4.3
```

```
fit = mle2(llik.cb.new, start = list(beta = 4.3), fixed=list(aratio=0.465, roomp=0.3),
  method = "Brent", data = list(I = y), lower=1, upper=15)
```

```
summary(fit)
confint(fit)
```

```
# > summary(fit)
# Maximum likelihood estimation
#
# Call:
# mle2(minuslogl = llik.cb.new, start = list(beta = 4.3), method = "Brent",
# fixed = list(aratio = 0.465, roomp = 0.3), data = list(I = y),
# lower = 1, upper = 15)
#
```

```
# Coefficients:
# Estimate Std. Error z value Pr(z)
# beta 4.27816 0.17823 24.004 < 2.2e-16 ***
# ---
# Signif. codes: 0 '***' 0.001 '**' 0.01 '*' 0.05 '.' 0.1 ' ' 1
```

```
# -2 log L: 492.5544
# > confint(fit)
# Profiling...
```

```
# 2.5 % 97.5 %
# 3.938852 4.637700
```

```
#####different roomp =rp=0.3 #####
##### aratio=0.505 #####
roomp =0.3
betacand = seq(0.1,15, by = 0.05)
ll = rep(NA, length(betacand))
```

```
# plot the likelihood and check maximum
for(i in 1:length(betacand)){
  ll[i] = llik.cb.new(beta = betacand[i],
    I = y, aratio=0.505, roomp=0.3)}
plot(ll ~ betacand, ylab = "Neg log-lik",
  xlab = expression(beta))
betacand[which.min(ll)]
```

```
# > betacand[which.min(ll)]
```



```
method = "Brent", data = list(I = y), lower=1, upper=15)
```

```
summary(fit)
confint(fit)
# > summary(fit)
# Maximum likelihood estimation
#
# Call:
# mle2(minuslogl = llik.cb.new, start = list(beta = 4.2), method = "Brent",
#     fixed = list(aratio = 0.505, roomp = 0.3), data = list(I = y),
#     lower = 1, upper = 15)
#
# Coefficients:
#      Estimate Std. Error z value    Pr(z)
# beta  4.19985    0.17477  24.031 < 2.2e-16 ***
# ---
# Signif. codes:  0 '***' 0.001 '**' 0.01 '*' 0.05 '.' 0.1 ' ' 1
#
# -2 log L: 457.5956
# > confint(fit)
# Profiling...
#
#    2.5 %    97.5 %
# 3.867103 4.552382
```

```
#####different roomp =rp=0.3 #####
##### aratio=0.6 #####
```

```
roomp =0.3
betacand = seq(0.1,15, by = 0.05)
ll = rep(NA, length(betacand))
```

```
# plot the likelihood and check maximum
for(i in 1:length(betacand)){
  ll[i] = llik.cb.new(beta = betacand[i],
    I = y, aratio=0.6, roomp=0.3)
}
plot(ll ~ betacand, ylab = "Neg log-lik",
  xlab = expression(beta))
betacand[which.min(ll)]
```

```
# > betacand[which.min(ll)]
# [1] 4.05
```

```
fit = mle2(llik.cb.new, start = list(beta = 4.05), fixed=list(aratio=0.6, roomp=0.3),
  method = "Brent", data = list(I = y), lower=1, upper=15)
```

```
summary(fit)
confint(fit)
```

```
# > summary(fit)
# Maximum likelihood estimation
#
# Call:
# mle2(minuslogl = llik.cb.new, start = list(beta = 4.05), method = "Brent",
#     fixed = list(aratio = 0.6, roomp = 0.3), data = list(I = y),
#     lower = 1, upper = 15)
#
# Coefficients:
#      Estimate Std. Error z value    Pr(z)
# beta  4.02549    0.16709  24.091 < 2.2e-16 ***
# ---
# Signif. codes:  0 '***' 0.001 '**' 0.01 '*' 0.05 '.' 0.1 ' ' 1
#
# -2 log L: 389.1513
# > confint(fit)
```

```
# 3.707301 4.362493
```

```
#####  
#####  
##### R0, aratio=0.505 rp=0.2 #####  
beta<- 3.78  
ubeta<- 4.09  
lbeta<- 3.49  
betaci<- c(lbeta, ubeta)
```

```
# R0 at time 3  
N0[1]*(1-exp(-beta/N0[1]))  
# > N0[1]*(1-exp(-beta/N0[1]))  
# 0  
# 3.778076
```

```
#> N0[1]*(1-exp(-betaci/N0[1]))  
# [1] 3.488359 4.087747
```

```
# R0 t=4 crew  
c0[4] *(1-exp(-beta/N0[3]))  
# > c0[4] *(1-exp(-beta/N0[3]))  
# 3  
# 1.059453
```

```
c0[4] *(1-exp(-betaci/N0[3]))  
# > c0[4] *(1-exp(-betaci/N0[3]))  
# [1] 0.9782106 1.1462913
```

```
# passengers in cabins t=4 with infected case  
# transmission prob  
(1-exp(-beta/2))  
#> (1-exp(-beta/2))  
#[1] 0.8489282
```

```
# R0 for passengers in cabins with contacts with asymptomatic crew  
# t=4  
(pgr0[4]-ipger[4])*(1-exp(-beta*0.505/c0[4]))  
# > (pgr0[4]-ipger[4])*(1-exp(-beta*0.505/c0[4]))  
# 3  
# 4.730159
```

```
(pgr0[4]-ipger[4])*(1-exp(-betaci*0.505/c0[4]))  
# > (pgr0[4]-ipger[4])*(1-exp(-betaci*0.505/c0[4]))  
# [1] 4.367571 5.117696
```

```
# overall R0 for both crew and passengers at t=4  
R4sum<- c0[4] *(1-exp(-beta/N0[3]))+(pgr0[4]-ipger[4])*(1-exp(-beta*0.505/c0[4]))  
#> c0[4]+(pgr0[4]-ipger[4])  
# 3  
#3609
```

```
beta4<- 3609*(-log(1-R4sum/3609))/2  
#> beta4  
# 3  
#2.89713
```

```
R4sum<- c0[4] *(1-exp(-betaci/N0[3]))+(pgr0[4]-ipger[4])*(1-exp(-betaci*0.505/c0[4]))  
beta4ci<- 3609*(-log(1-R4sum/3609))/2  
#> beta4ci  
#[1] 2.674873 3.134715
```

```

# > c0[5] *(1-exp(-beta/N0[4]))
#      4
# 1.051642

c0[5] *(1-exp(-betaci/N0[4]))
# > c0[5] *(1-exp(-betaci/N0[4]))
# [1] 0.9709987 1.1378391

# R0 for passengers in cabins with contacts with asymptomatic crew
# t=5
(pgr0[5]-ipger[5])*(1-exp(-beta*0.505/c0[5]))
#> (pgr0[5]-ipger[5])*(1-exp(-beta*0.505/c0[5]))
#      4
# 4.394232

(pgr0[5]-ipger[5])*(1-exp(-betaci*0.505/c0[5]))
#> (pgr0[5]-ipger[5])*(1-exp(-betaci*0.505/c0[5]))
#[1] 4.057401 4.754239

#overall R0 for both crew and passengers at t=5
R5sum<- c0[5] *(1-exp(-beta/N0[4]))+(pgr0[5]-ipger[5])*(1-exp(-beta*0.505/c0[5]))
#> c0[5]+(pgr0[5]-ipger[5])
#      3
# 3357

beta5<- 3357*(-log(1-R5sum/3357))/2
#> beta5
#      4
#2.725148

R5sum<- c0[5] *(1-exp(-betaci/N0[4]))+(pgr0[5]-ipger[5])*(1-exp(-betaci*0.505/c0[5]))
beta5ci<- 3357*(-log(1-R5sum/3357))/2
#> beta5ci
#[1] 2.516084 2.948628

#####
#### PLOT figure 1 (a) #####
par(mfrow=c(1,2))
plot(x=c(1, 18, 19, 23, 24, 30), y=c(3.78, 3.78, 4.73, 4.73, 4.39, 4.39), col=4, ylim=c(0, 5), type="l", xlab="Day", ylab="R0", main="serial interval=6 days")
lines(x=c(1, 18, 19, 23, 24, 30), y=c(3.49, 3.49, 4.37, 4.37, 4.06, 4.06), lty=2, col=4)
lines(x=c(1, 18, 19, 23, 24, 30), y=c(4.09, 4.09, 5.12, 5.12, 4.75, 4.75), lty=2, col=4)

lines(x=c(1, 18, 19, 23, 24, 30), y=c(3.78, 3.78, 1.06, 1.06, 1.05, 1.05), col=2)
lines(x=c(1, 18, 19, 23, 24, 30), y=c(3.49, 3.49, 0.98, 0.98, 0.97, 0.97), lty=2, col=2)
lines(x=c(1, 18, 19, 23, 24, 30), y=c(4.09, 4.09, 1.15, 1.15, 1.14, 1.14), lty=2, col=2)

lines(x=c(1,18), y=c(3.78, 3.78))
lines(x=c(1, 18), y=c(3.49, 3.49), lty=2)
lines(x=c(1, 18), y=c(4.09, 4.09), lty=2)

#####
##### PLOT figure 1(b) #####
##### PLOT serial interval=5 days #####

plot(x=c(1, 15, 16, 20, 21, 25, 26, 30), y=c(3.27, 3.27, rep(4.18,2), rep(4.08,2), rep(3.74,2)), col=4, ylim=c(0, 5), xlab="Day", ylab="R0", main="serial interval=5 days")
lines(x=c(1, 15, 16, 20, 21, 25, 26, 30), y=c(rep(3.02,2), rep(3.86,2), rep(3.77, 2), rep(3.45,2)), lty=2, col=4)
lines(x=c(1, 15, 16, 20, 21, 25, 26, 30), y=c(rep(3.54,2), rep(4.52,2), rep(4.42, 2), rep(4.04,2)), lty=2, col=4)

lines(x=c(1, 15, 16, 20, 21, 25, 26, 30), y=c(3.27, 3.27, rep(0.92, 4), rep(0.91,2)), col=2)
lines(x=c(1, 15, 16, 20, 21, 25, 26, 30), y=c(rep(3.02,2), rep(0.85, 4), rep(0.84,2)), lty=2, col=2)
lines(x=c(1, 15, 16, 20, 21, 25, 26, 30), y=c(rep(3.54,2), rep(1,2), rep(0.99,2), rep(0.98,2)), lty=2, col=2)

lines(x=c(1,15), y=c(3.27, 3.27))
lines(x=c(1, 15), y=c(3.02, 3.02), lty=2)

```

```
#####
```

```
#####
```

```
##### R0, aratio=0.505 rp=0.3 #####
```

```
beta<- 4.20  
ubeta<- 3.87  
lbeta<- 4.55  
betaci<- c(lbeta, ubeta)
```

```
# R0 at t=3  
N0[1]*(1-exp(-beta/N0[1]))  
# > N0[1]*(1-exp(-beta/N0[1]))  
# 0  
# 4.197624
```

```
# > N0[1]*(1-exp(-betaci/N0[1]))  
# [1] 4.547212 3.867983
```

```
# R0 t=4 for crew  
c0[4] *(1-exp(-beta/N0[3]))  
# > c0[4] *(1-exp(-beta/N0[3]))  
# 3  
# 1.177103
```

```
c0[4] *(1-exp(-betaci/N0[3]))  
# > c0[4] *(1-exp(-betaci/N0[3]))  
# [1] [1] 1.275135 1.084665
```

```
# passengers in cabins t=4 with infected case  
#transmission prob  
(1-exp(-beta/2))  
#> (1-exp(-beta/2))  
#[1] 0.8775436
```

```
# R0 for passengers in cabins with contacts with asymptomatic crew#  
# t=4  
(pgr0[4]-ipger[4])*(1-exp(-beta*0.505/c0[4]))  
#> (pgr0[4]-ipger[4])*(1-exp(-beta*0.505/c0[4]))  
# 3  
# 5.255195
```

```
(pgr0[4]-ipger[4])*(1-exp(-betaci*0.505/c0[4]))  
# > (pgr0[4]-ipger[4])*(1-exp(-betaci*0.505/c0[4]))  
# [1] 5.692643 4.842676
```

```
#overall R0 for both crew and passengers t=4  
R4sum<- c0[4] *(1-exp(-beta/N0[3]))+(pgr0[4]-ipger[4])*(1-exp(-beta*0.505/c0[4]))  
#> R4sum  
# 3  
# 6.432298  
# > c0[4]+(pgr0[4]-ipger[4])  
# 3  
# 3609
```

```
beta4<- 3609*(-log(1-R4sum/3609))/2  
#> beta4  
# 3  
# 3.219018
```

```
R4sum<- c0[4] *(1-exp(-betaci/N0[3]))+(pgr0[4]-ipger[4])*(1-exp(-betaci*0.505/c0[4]))  
beta4ci<- 3609*(-log(1-R4sum/3609))/2  
# > beta4ci
```

```
c0[5] *(1-exp(-beta/N0[4]))
#> c0[5] *(1-exp(-beta/N0[4]))
#      4
#1.168424
```

```
c0[5] *(1-exp(-betaci/N0[4]))
#> c0[5] *(1-exp(-betaci/N0[4]))
#[1] 1.265731 1.076667
```

```
# R0 for passengers in cabins with contacts with asymptomatic crew#
# t=5
(pgr0[5]-ipger[5])*(1-exp(-beta*0.505/c0[5]))
#> (pgr0[5]-ipger[5])*(1-exp(-beta*0.505/c0[5]))
#      4
# 4.88197
```

```
(pgr0[5]-ipger[5])*(1-exp(-betaci*0.505/c0[5]))
# > (pgr0[5]-ipger[5])*(1-exp(-betaci*0.505/c0[5]))
# [1] 5.288341 4.498756
```

```
# overall R0 for both crew and passengers t=5
```

```
R5sum<- c0[5] *(1-exp(-beta/N0[4]))+(pgr0[5]-ipger[5])*(1-exp(-beta*0.505/c0[5]))
#> c0[5]+(pgr0[5]-ipger[5])
#      3
# 3357
```

```
beta5<- 3357*(-log(1-R5sum/3357))/2
# > beta5
#      4
# 3.027926
```

```
R5sum<- c0[5] *(1-exp(-betaci/N0[4]))+(pgr0[5]-ipger[5])*(1-exp(-betaci*0.505/c0[5]))
beta5ci<- 3357*(-log(1-R5sum/3357))/2
# > beta5ci
# [1] 3.280240 2.790029
```

```
#####
#####
##### PLOT Figure 2 #####
```

```
set.seed(20200302)
plot(y, type="n", xlim=c(0,16), ylim=c(1, 1800),
     ylab="Predicted/observed cases", xlab="time in units of the serial interval of 6 days")
```

```
#here the first j index correspond1 to time 0
It<- matrix(1, nrow=100, ncol=16)
newI<- matrix(0, nrow=100, ncol=16 )
newI[,1]<- 1
Sus <- matrix(3700, nrow=100, ncol=16)
```

```
for (i in 1:100) {
  Ntotal<-3700
  for (j in 2:16) {
    if (Sus[i,j-1] >0)
      { newcase=rbinom(1, size=Sus[i,j-1], prob=(1-exp(-3.78*newI[i,j-1]/Sus[i,j-1])))
        newI[i,j]=newcase
        It[i,j]=It[i,j-1]+newcase
      }
    if (Sus[i,j-1]> newcase) { Sus[i,j]=Sus[i,j-1]-newcase
                              Ntotal=Ntotal-newcase }
    else Sus[i,j]=0
  }
}
```

```
}  
points(seq(0, 5, by=1),y, type="b", col=2)
```

```
#####  
#  
#  
#> summary(It[,6])  
#   Min. 1st Qu.  Median    Mean 3rd Qu.    Max.  
#   1.0   562.0   790.5   855.7 1100.0  2382.0  
#  
#> sqrt(var(It[,6]))  
#[1] 439.6533  
#  
#####  
#> summary(Sus[,11])  
#   Min. 1st Qu.  Median    Mean 3rd Qu.    Max.  
#   2.00   9.75   12.00   85.71  16.00 1480.00  
#> summary(Sus[,6])  
#   Min. 1st Qu.  Median    Mean 3rd Qu.    Max.  
#  440.0   723.8   895.0   905.6 1107.2  1480.0  
  
#####  
##### The END #####
```
